# Supplementary material
Source: Springer Nature journal article supplement (https://www.springermedizin.de/resource/supplementary/13049_2012_543_MOESM3_ESM.pdf/9666884)
Supplement: MOESM3 [file 9666884]

# Adult ALS Algorithm

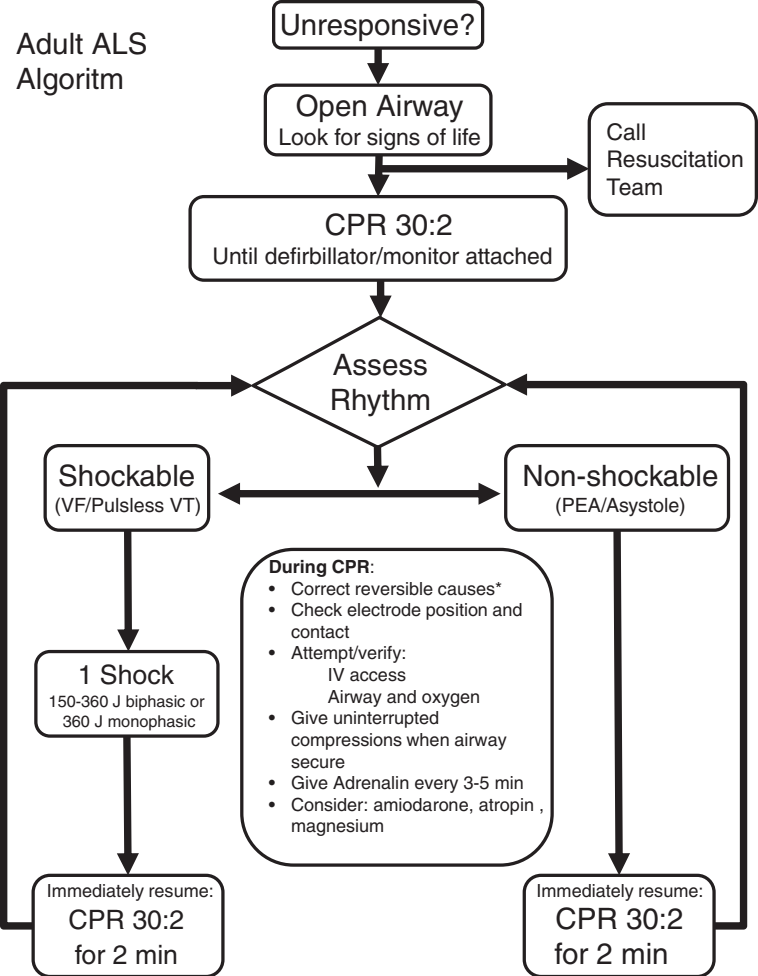

## \*Reversible Causes:

Hypoxia  
Hypovolaemia  
Hypo/hyperkalaemia/Metabolic  
Hypothermia

Tension Pneumothorax  
Tamponade, cardiac  
Toxins  
Thrombosis (coronary or pulmonary)
